# Supplementary material for: Super-Coulombic atom–atom interactions in hyperbolic media
Source: PubMed Central journal article supplement (PMC5288497; doi:10.1038/ncomms14144), 2017-01-25
Supplement: ncomms14144-s1.pdf [file ncomms14144-s1.pdf]

## Supplementary Information

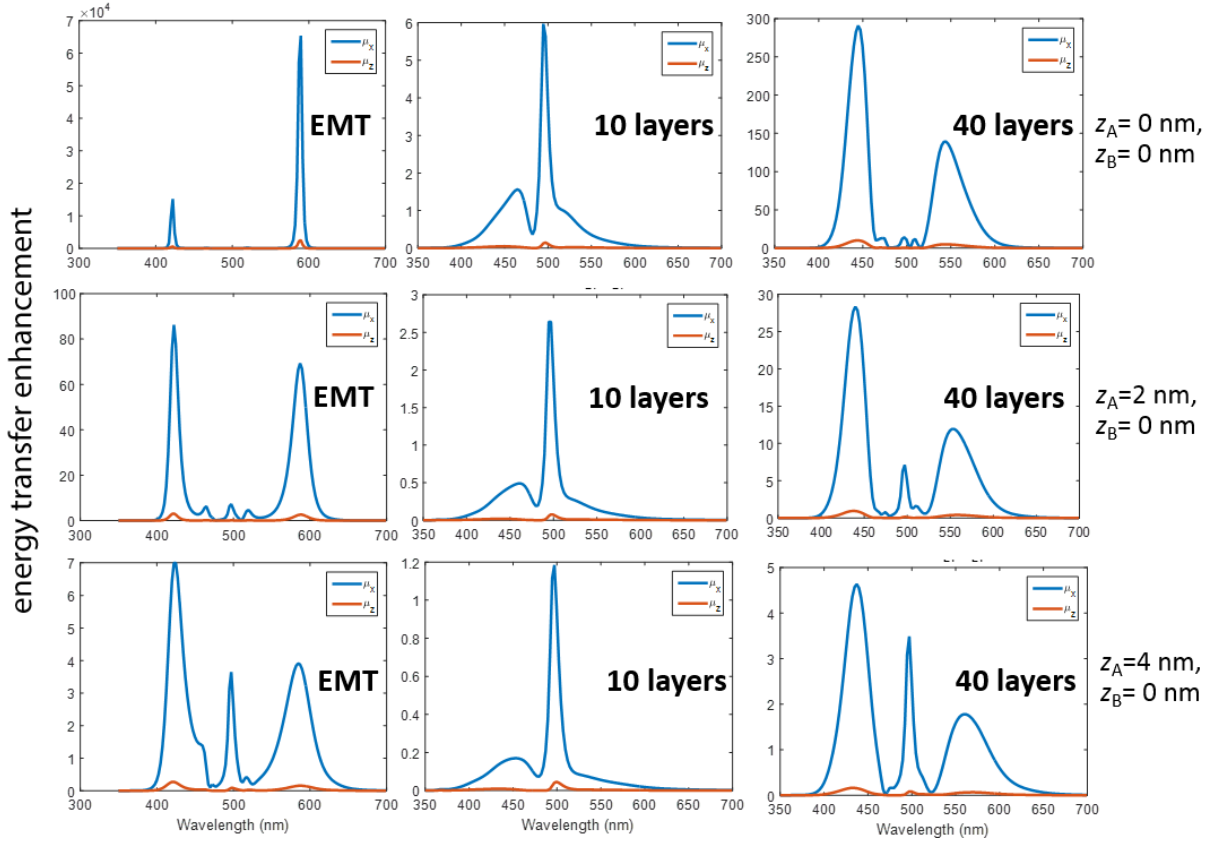

**Supplementary Figure 1.** Comparison of plasmonic super-lattice and effective medium theory as a function of sublayer thickness, total number of layers, and donor separation distance from top interface.

| Platform                         | Circuit QED                    | Ultra-cold atoms               |                                            | Self-assembled quantum dots               | Our materials approach                                                                |
|----------------------------------|--------------------------------|--------------------------------|--------------------------------------------|-------------------------------------------|---------------------------------------------------------------------------------------|
|                                  |                                | photonic crystal               | optical trap                               |                                           |                                                                                       |
| dipole-dipole interaction method | transmission line waveguide    | band-edge waveguide (1-D)      | conventional near-field dipole interaction | conventional far-field dipole interaction | controlled by $k$ -surface engineering of hyperbolic polaritons                       |
| Temperature requirement          | low temp. $\ll 1$ K            | low temp. $\ll 1$ mK           | low temp. $\ll 1$ mK                       | low temp. $\sim 2$ K                      | room temp. due to broadband effect                                                    |
| Scaling $J_{dd}$                 | (radiative) $\sim \sin(k_0 r)$ | (radiative) $\sim \sin(k_0 r)$ | (non-radiative) $\sim 1/r^3$               | (radiative) $\sim \cos(k_0 r) / r$        | (Super-Coulombic) $\sim 1/(N(\theta)r)^3$ , $N(\theta) \rightarrow 0$                 |
| Typical spatial range            | few wavelengths $\sim \lambda$ | few wavelengths $\sim \lambda$ | extreme near-field $\sim \lambda/100$      | sub wavelength $\sim \lambda/2$           | $>10x$ beyond near-field range; $10^2 - 10^3$ magnitude increase from other materials |

**Supplementary Table 1:** Comparison of Super-Coulombic interaction with established techniques for controlling dipole-dipole interactions.

## Supplementary Note 1. Plasmonic Super-Lattice analysis

In this note, we provide numerical simulations comparing a practical plasmonic super-lattice structure with the corresponding effective medium theory. We consider the effect of sublayer thickness and total number of layers in the super-lattice metamaterial structure.

In supplementary Fig. 1, we plot the energy transfer enhancement for two dipoles on either side of a slab with a fixed slab thickness of 100 nm. By controlling the total number of layers of the super-lattice, we show the net effect of sublayer thickness and unit-cell size. We also vary the separation distance  $z_A$  of atom A from the top interface. Atom B is assumed to be adsorbed to the bottom interface. Note that the super-lattice structure has a better match with EMT as the unit-cell size decreases and the total number of layers increases. This is a result of the wave-vector cut-off that is imposed by the finite unit-cell size.

## Supplementary Note 2. Dyadic Green function for hyperbolic meta-surface

Here, we provide details for the calculation of resonant dipole-dipole interactions above a hyperbolic meta-surface. The hyperbolic meta-surface is modeled as uniaxial medium half-space with an optic axis  $c$  parallel to the interface,  $\hat{\mathbf{c}} = \hat{\mathbf{x}}$ . The dyadic Green function can be decomposed in terms of a bulk and scattered term in the upper half-space ( $z > 0$ ) and a scattered-only term in the lower half-space ( $z < 0$ )

$$\mathbf{G}(\mathbf{r}, \mathbf{r}', \omega) = \mathbf{G}_o(\mathbf{r}, \mathbf{r}', \omega) + \mathbf{G}^r(\mathbf{r}, \mathbf{r}', \omega) \quad \text{for } z, z' > 0 \quad (1)$$

$$\mathbf{G}(\mathbf{r}, \mathbf{r}', \omega) = \mathbf{G}^t(\mathbf{r}, \mathbf{r}', \omega) \quad \text{for } z < 0, z' > 0 \quad (2)$$

The source medium is assumed to be vacuum ( $\epsilon_1 = 1$ ), while the uniaxial half-space has permittivity  $\boldsymbol{\epsilon} = \text{diag}[\epsilon_x, \epsilon_z, \epsilon_z]$ . Applying a plane-wave expansion, the reflected and transmitted dyadic Green functions for two  $z$ -oriented dipoles take the form

$$G_{zz}^r(\mathbf{r}) = \frac{i}{8\pi^2 k_1^2} \int dk_\rho d\phi \frac{k_\rho^3}{k_{z1}} r_{pp}(k_\rho, \phi) e^{ik_\rho \rho \cos(\phi-\theta) + ik_{z1}(z+d)} \quad (3)$$

$$G_{zz}^t(\mathbf{r}) = \frac{i}{8\pi^2 k_1 k_2} \int dk_\rho d\phi \frac{k_\rho^3}{k_{z1}} [t_{op}(k_\rho, \phi) k_2 \sin \phi e^{-ik_{zo}z} + t_{ep}(k_\rho, \phi) k_{ze} \cos \phi e^{-ik_{ze}z}] e^{ik_\rho \rho \cos(\phi-\theta) + ik_{z1}d} \quad (4)$$

where  $k_1 = \sqrt{\epsilon_1} \omega / c$ ,  $k_2 = \sqrt{\epsilon_z} \omega / c$  and  $d$  is the distance away from the interface of the donor dipole. Note that we have used the cylindrical coordinates

$$\begin{aligned} k_x &= k_\rho \cos \phi, & k_y &= k_\rho \sin \phi \\ x &= \rho \cos \theta, & y &= \rho \sin \theta. \end{aligned}$$

and also defined  $k_{z1} = \sqrt{k_1^2 - k_\rho^2}$  for the upper half-space, and  $k_{zo} = \sqrt{k_2^2 - k_\rho^2}$ ,  $k_{ze} = \sqrt{\epsilon_x \omega^2 / c^2 - k_y^2 - k_x^2 \epsilon_x / \epsilon_z}$  as the ordinary and extraordinary wave contributions in the lower half-space respectively. The p-polarization to p-polarization reflection coefficient takes the form

$$r_{pp} = -\frac{\epsilon_z k_y^2 k_o^3 (k_{z1} + k_{ze})(\epsilon_1 k_{zo} - \epsilon_z k_{z1}) + k_x^2 k_{zo} k_o (k_{z1} + k_{zo})(\epsilon_1 k_{zo}^2 - \epsilon_z k_{z1} k_{ze})}{\sqrt{\epsilon_z} \Delta (k_x^2 + k_y^2) \sqrt{(k_y^2 + k_{zo}^2)(k_y^2 + k_{ze}^2)}} \quad (5)$$

while the p-polarization to ordinary- and extraordinary- polarization transmission coefficients take the form

$$t_{op} = \frac{2k_{z1} k_y k_o^2}{\Delta} \frac{(k_{z1} + k_{ze}) \sqrt{\epsilon_1 \epsilon_z}}{\sqrt{(k_x^2 + k_y^2)(k_{ze}^2 + k_y^2)}} \quad (6)$$

$$t_{ep} = \frac{2k_{z1} k_{zo} k_1 k_x}{\Delta} \frac{k_{z1} + k_{zo}}{\sqrt{(k_x^2 + k_y^2)(k_y^2 + k_{zo}^2)}} \quad (7)$$

where

$$\Delta = \frac{k_x^2 k_{zo} k_o (k_{z1} + k_{zo})(\epsilon_1 k_{zo}^2 + \epsilon_z k_{z1} k_{ze}) + \epsilon_z k_y^2 k_o^3 (k_{z1} + k_{ze})(\epsilon_1 k_{zo} + \epsilon_z k_{z1})}{\sqrt{\epsilon_z} (k_x^2 + k_y^2) \sqrt{k_{zo}^2 + k_y^2} \sqrt{k_{ze}^2 + k_y^2}} \quad (8)$$

## Supplementary References

- [1] Luigi Frunzio, Andreas Wallraff, David Schuster, Johannes Majer, and Robert Schoelkopf. *Fabrication and characterization of superconducting circuit qed devices for quantum computation*. *IEEE transactions on applied superconductivity*, 15(2):860-863, (2005).
- [2] A Goban, C-L Hung, JD Hood, S-P Yu, JA Muniz, O Painter, and HJ Kimble. *Superradiance for atoms trapped along a photonic crystal waveguide*. *Physical review letters*, 115(6):063601, (2015).
- [3] Sylvain Ravets, Henning Labuhn, Daniel Barredo, Lucas B\_eguín, Thierry Lahaye, and Antoine Browaeys. *Coherent dipole-dipole coupling between two single rydberg atoms at an electrically-tuned forster resonance*. *Nature Physics*, 10(12):914-917, (2014).
- [4] Michael Scheibner, Thomas Schmidt, Lukas Worschech, Alfred Forchel, Gerd Bacher, Thorsten Passow, and Detlef Hommel. *Superradiance of quantum dots*. *Nature Physics*, 3(2):106-110, (2007).
